# Supplementary material for: Effect of Different Clarification Treatments on the Volatile Composition and Aromatic Attributes of ‘Italian Riesling’ Icewine
Source: PubMed Central journal article supplement (PMC7321132; doi:10.3390/molecules25112657), 2020-06-08
Supplement: molecules-25-02657-s001.pdf [file molecules-25-02657-s001.pdf]

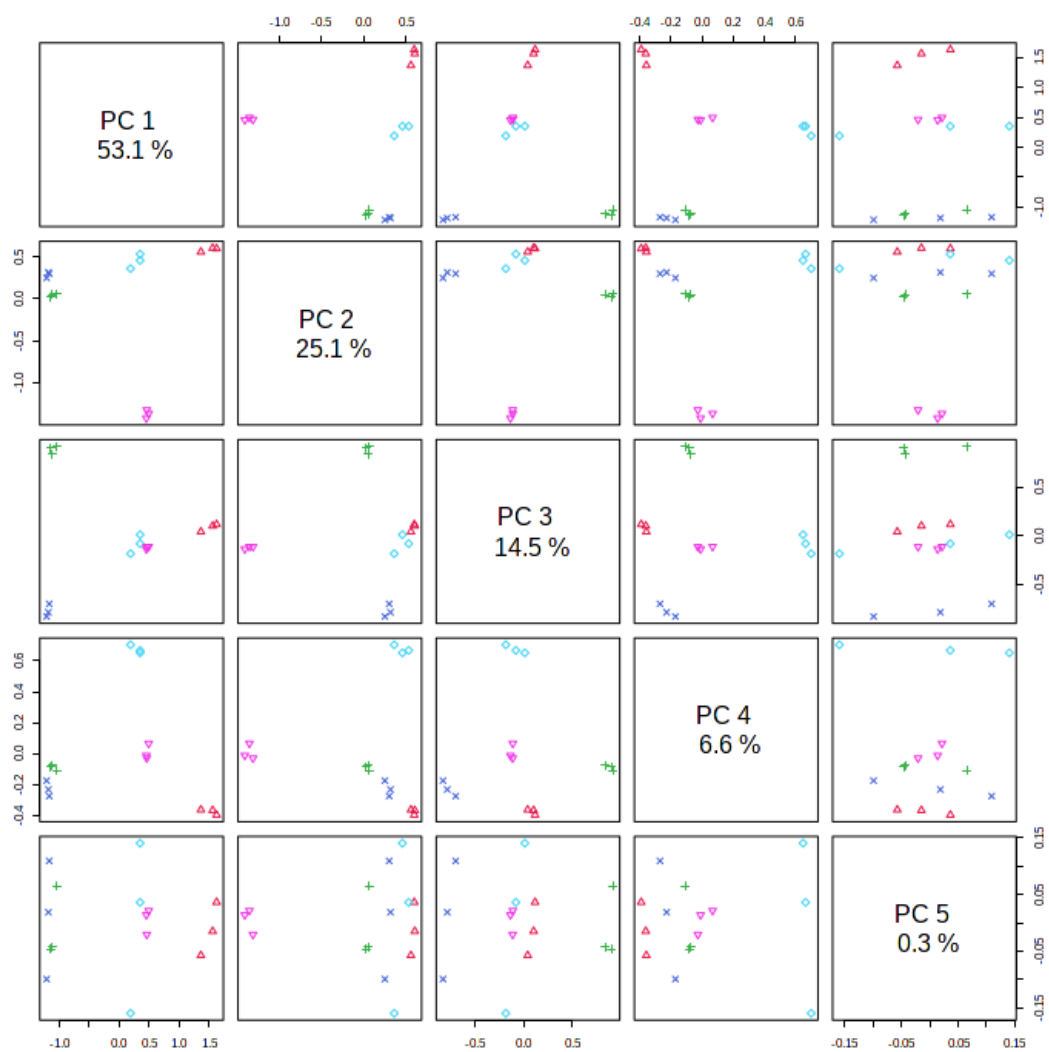

Figure S1: Principal component analysis score plot of volatile compounds (OAV>1) in wine samples with different clarification treatments

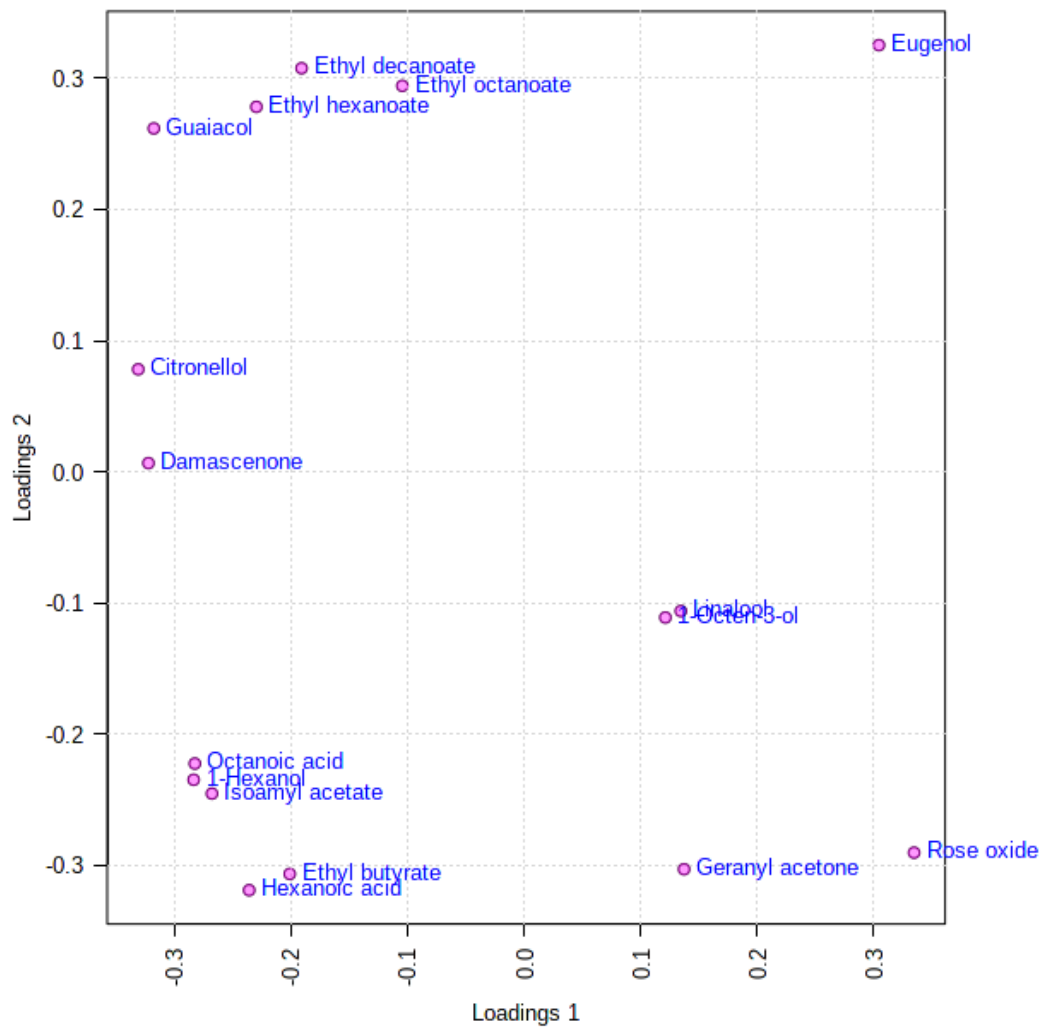

Figure S2: Principal component analysis loading plot of volatile compounds (OAV>1) in wine samples with different clarification treatments

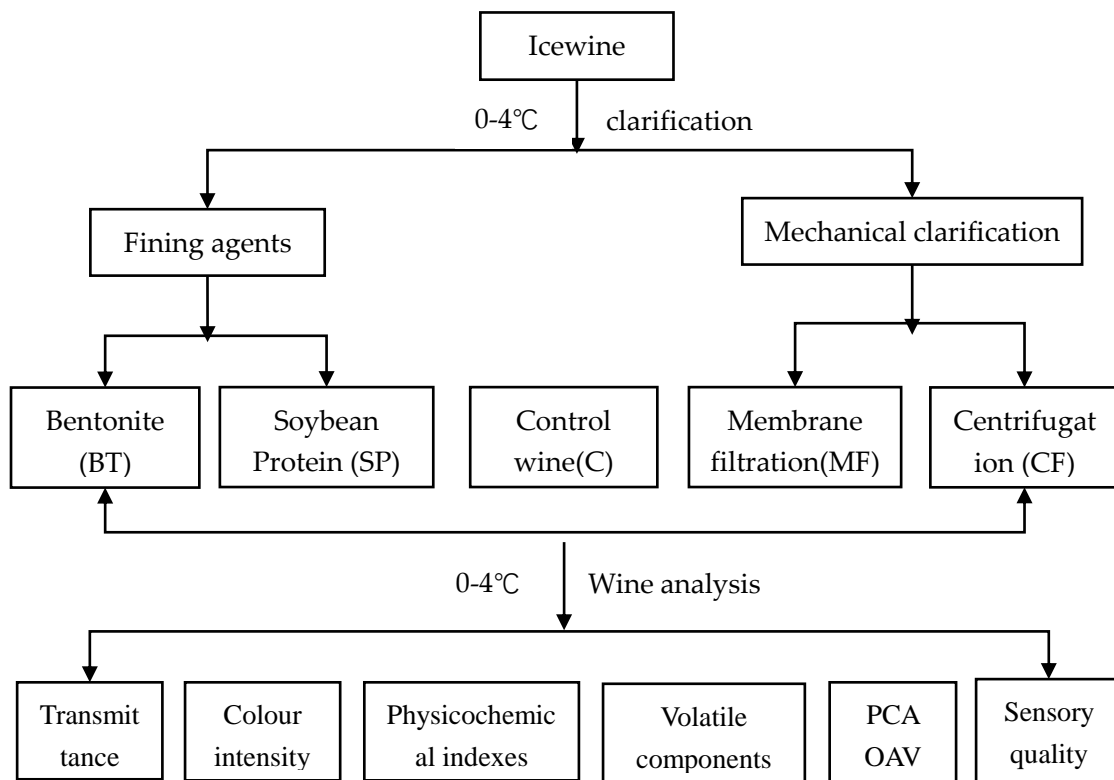

Figure S3: The diagram of experiment
